# Supplementary material
Source: Springer Nature journal article supplement (https://www.springermedizin.de/resource/supplementary/12885_2011_2801_MOESM3_ESM.pdf/9461982)

**(A)****U266**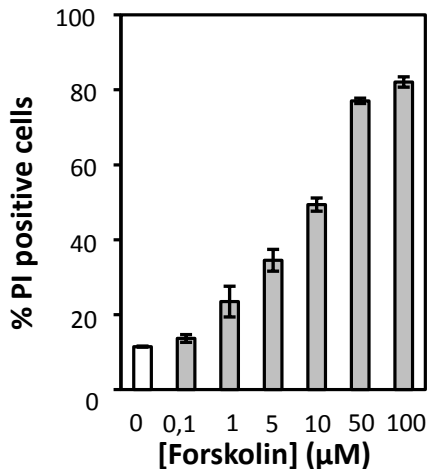**(B)****INA-6**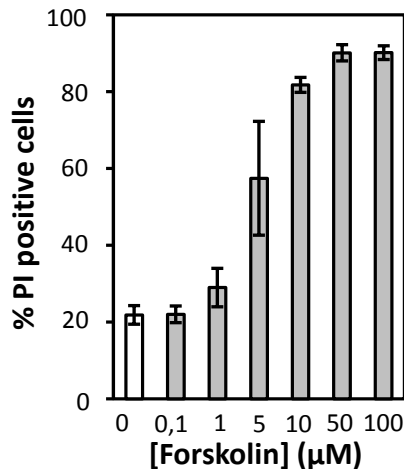**(C)****INA-6**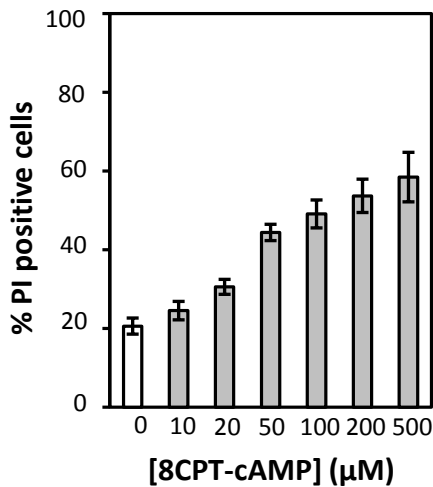**(D)****INA-6**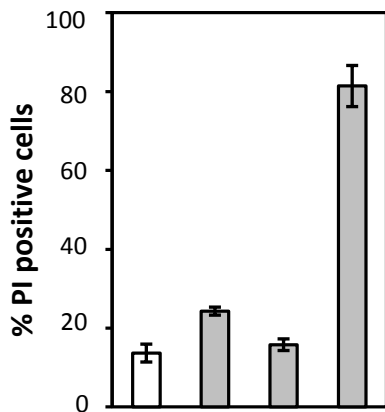

|                           |   |   |   |   |
|---------------------------|---|---|---|---|
| Rolipram 5 $\mu\text{M}$  | - | + | - | + |
| Forskolin 1 $\mu\text{M}$ | - | - | + | + |

Supplement: MOESM3 [file 9461982]
